# Supplementary material
Source: publisher figshare collection journal article supplement (https://karger.figshare.com/ndownloader/files/12785024)
Supplement: Supplementary file 1 [file 12785024]

| **GA** | **p5** | **p50** | **p95** | **number of volumes measured** |
| --- | --- | --- | --- | --- |
| 8+0 | 2.22 | 3.23 | 4.19 | 29 |
| 9+0 | 2.89 | 4.04 | 5.14 | 62 |
| 10+0 | 3.55 | 4.79 | 5.97 | 67 |
| 11+0 | 3.84 | 5.01 | 6.14 | 17 |
| 12+0 | 3.89 | 4.94 | 5.96 | 3 |

*Table S3: reference values of the maximum width of the midgut herniation (mm); GA: gestational age*
